# Supplementary material
Source: PubMed Central journal article supplement (PMC4829351)
Supplement: NIHMS772522-supplement-Supplemental.pdf [file NIHMS772522-supplement-Supplemental.pdf]

# Chemical structure of amphiphilic copolymer

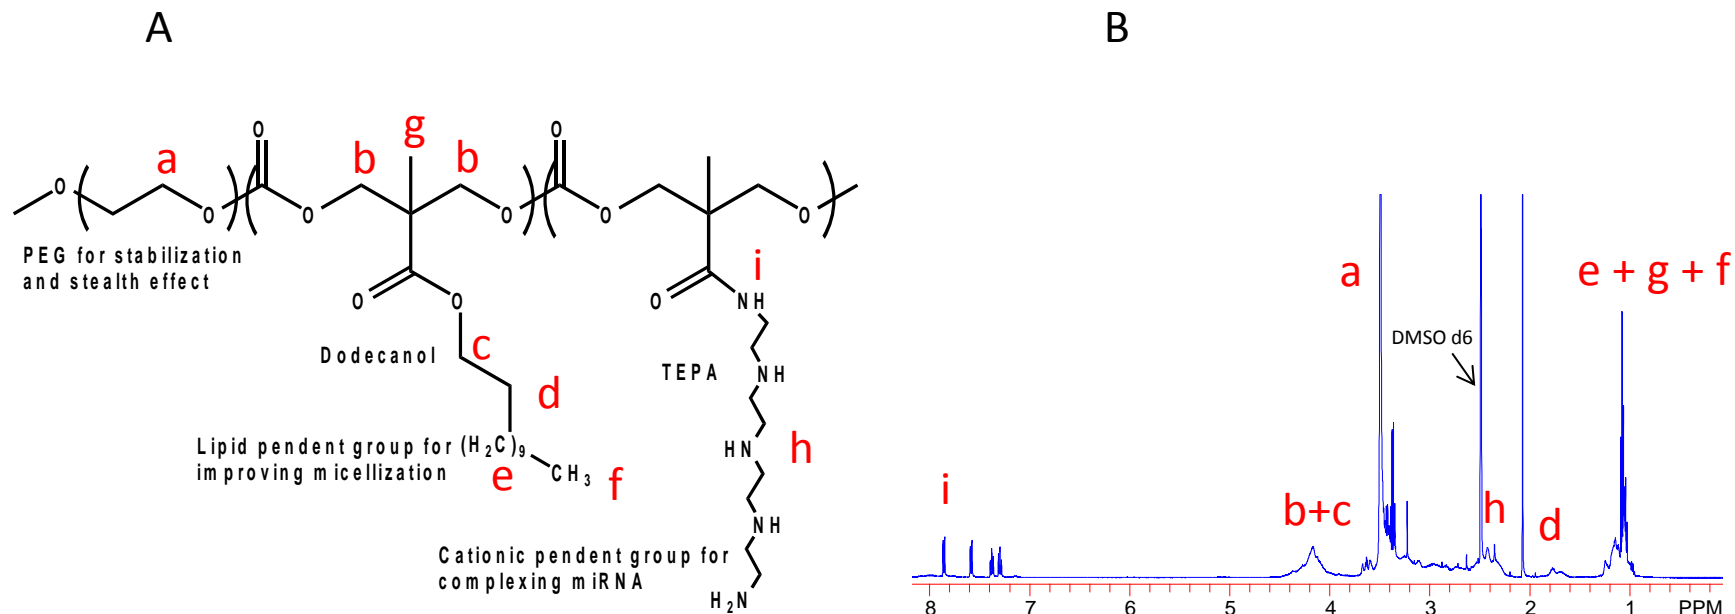

**Fig. S1.** Design of amphiphilic copolymer for co-delivery of GDC-0449 and miR-let7b for treating for pancreatic cancer. (A) Schematic representation of copolymer (B) <sup>1</sup>H NMR

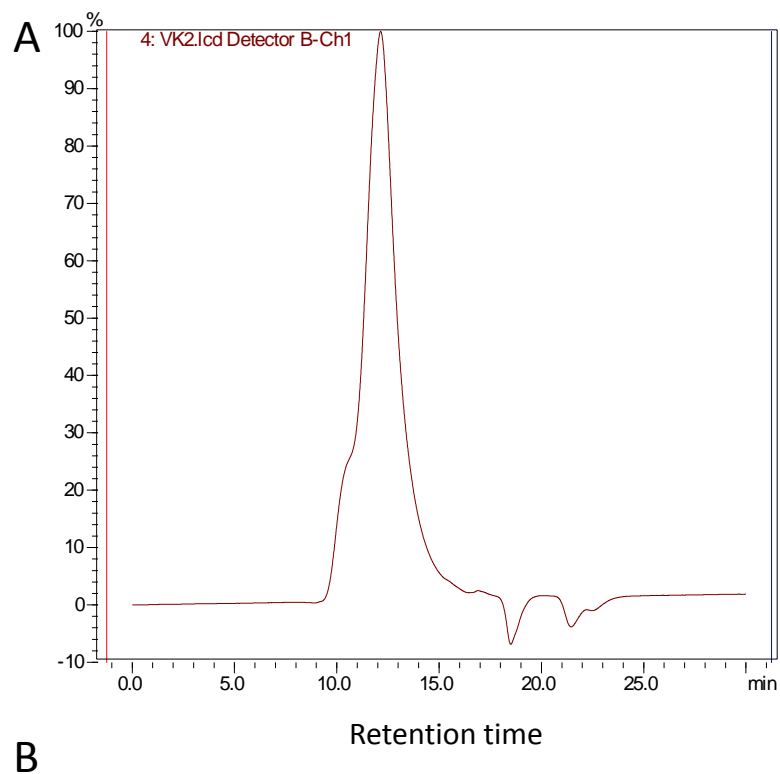

**B**

| Number Average M.W. | Weight Ave. | Mw/Mn |
|---------------------|-------------|-------|
| 6797                | 13776       | 2.02  |

**Fig. S2.** (A ) Refractive index-gel permeation chromatography (RI-GPC) traces of mPEG-b-PCC-g-DC-g-TEPA copolymer. (B) Specifics of molecular weight data and characteristics

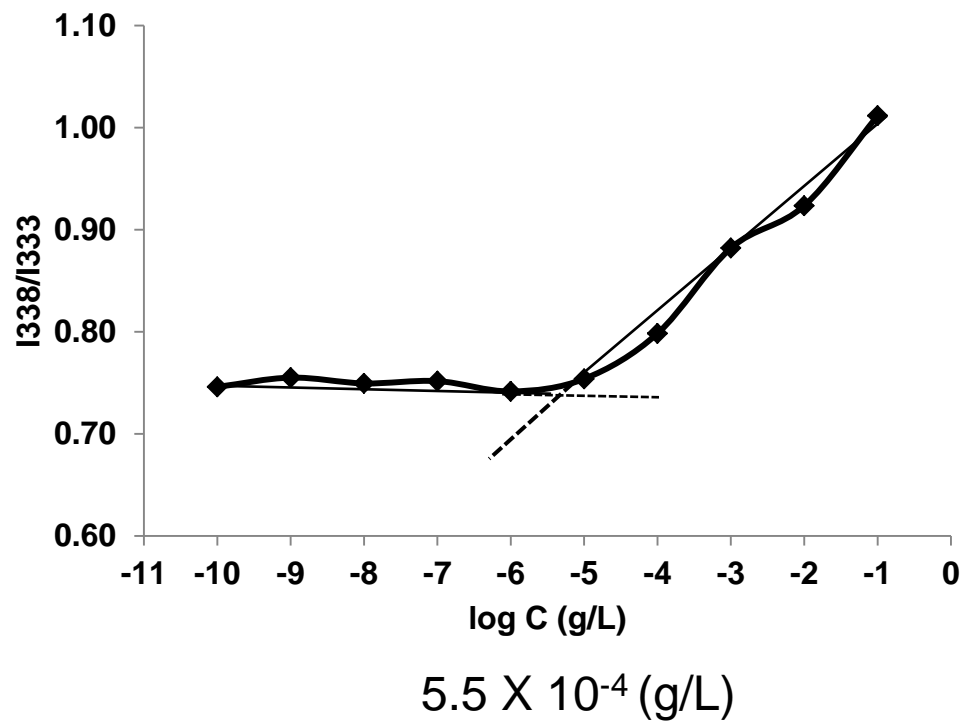

**Fig. S3.** Plot of fluorescence intensity of pyrene vs. logarithm of the mPEG-b-PCC-g-DC-g-TEPA copolymer.

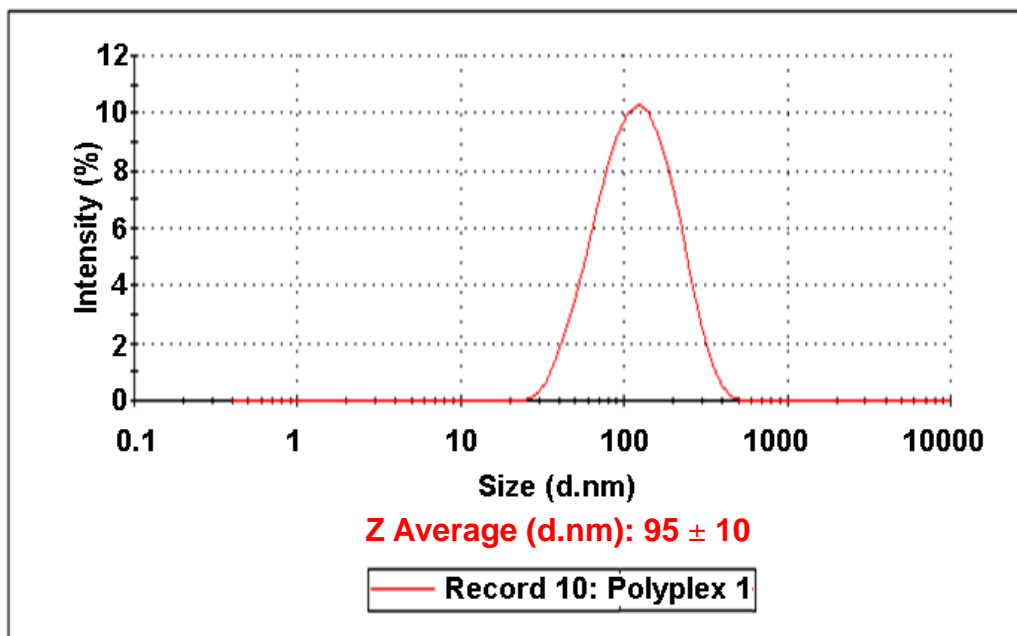

**Fig. S4.** Particle size distribution of GDC-0449 encapsulated micelles using dynamic light scattering.
